# Supplementary material for: Construction of a Nomogram to Predict Overall Survival in Patients with Early-Onset Hepatocellular Carcinoma: A Retrospective Cohort Study
Source: MDPI journal article supplement (doi:10.3390/cancers15225310), 2023-11-07
Supplement: s1 [file s1]

**Table S1.** Characteristics of patients in external validation cohort

| Characteristics                     | Validation cohort 2<br>(n=105) |
|-------------------------------------|--------------------------------|
| <b>Age, n (%)</b>                   |                                |
| ≥40                                 | 79 (5.7%)                      |
| <40                                 | 26 (1.9%)                      |
| <b>Sex, n (%)</b>                   |                                |
| Male                                | 85 (6.1%)                      |
| Female                              | 20 (1.4%)                      |
| <b>Marital_status, n (%)</b>        |                                |
| Divorced                            | 23 (1.7%)                      |
| Married                             | 82 (5.9%)                      |
| Single                              | 0 (0%)                         |
| Other                               | 0 (0%)                         |
| <b>Race, n (%)</b>                  |                                |
| White                               | 0 (0%)                         |
| Other                               | 105 (7.5%)                     |
| Black                               | 0 (0%)                         |
| <b>Grade, n (%)</b>                 |                                |
| Unknown                             | 49 (3.5%)                      |
| Poor/Undifferentiated               | 26 (1.9%)                      |
| Well/Moderate                       | 30 (2.2%)                      |
| <b>AJCC_Stage, n (%)</b>            |                                |
| stage I-II                          | 15 (1.1%)                      |
| Unknown                             | 43 (3.1%)                      |
| stage III-IV                        | 47 (3.4%)                      |
| <b>Dissected lymph nodes, n (%)</b> |                                |
| 0                                   | 91 (6.5%)                      |
| 1-3                                 | 11 (0.8%)                      |
| ≥4                                  | 3 (0.2%)                       |
| <b>Surgery, n (%)</b>               |                                |
| No                                  | 69 (5%)                        |
| Yes                                 | 36 (2.6%)                      |
| <b>Chemotherapy, n (%)</b>          |                                |

|                            |            |
|----------------------------|------------|
| No                         | 74 (5.3%)  |
| Yes                        | 31 (2.2%)  |
| <b>AFP, n (%)</b>          |            |
| Negative                   | 31 (2.2%)  |
| Positive                   | 74 (5.3%)  |
| Unknown                    | 0 (0%)     |
| <b>Tumor_size, n (%)</b>   |            |
| ≤5cm                       | 23 (1.7%)  |
| 5-10cm                     | 45 (3.2%)  |
| >10cm                      | 37 (2.7%)  |
| <b>Tumor_Number, n (%)</b> |            |
| 1                          | 103 (7.4%) |
| 2                          | 2 (0.1%)   |

---
